# Supplementary material for: Identification of a New Transcriptional Co-Regulator of STEAP1 in Ewing’s Sarcoma
Source: MDPI journal article supplement (doi:10.3390/cells10061300), 2021-05-24
Supplement: s1 [file s1]

**Figure S1:**

ACTAGAAACAACAGGTGTAAGATTCTATTTCCACCACAAGGTGTCAGTCCACGGTAATT  
TAAGCTTCAAA**GGGCTTTAACTAATCCAAGGAAAG**TCAGTGACTACAGAAAATACTTA  
TATTAAAACATGCTTTGTTAAACGGATGCTTGAAGGCGGCATGCTAGTTAAGAGTCATC  
ACCACTCCCTAATC**TCAAGTAC**TCAGGGACACAAACACTGCGGAAGGCCGAGGGTCCT  
CTGCCTAGGAAAACAGAGAACTTTGTTCACCTGTTTATCTGCTGACCTTCCCTCCACT  
ATTGTCCTATGACCCTGCCAAATCCCCCTCTG**CGAGAAACACCCAAGAATGATCAATAA**  
AAAAAAAAATAATAATAATTAAAAAAAAAAAAAGTAAAAAAAAAAAAAAAAAAAAAAAAA  
ACATGAACAGTCTTCGGTGCCCTAGCAGTGAATAAAAAACAATCATGGAAAATGTGGTT  
GCGCGTTTATTTTCTTTGTGTTTTCTACTCAGCTTAGTCCTGAGAATGTTGTATACCA  
AATCCCCAGAATTTTGCAATTCATGTCTCAGACCTATCTTGAGG**CTGGTTCCAACGGA**  
**GAGAAG**TAAATCCCTGCT**TCAAGTTG**TCTTTTTCTAAAACCTTGGAATATTAACAGTTA  
ACTTTACTTTAGGTTTGGAATACTTCATTGAGCTAGGATATGGGAAGCTGCACTTAAAA  
GCTAAGGCAAGGAAGGGAGGGACGGAGTAAACATGGGGTTTAAGGGTTTTTTTTTCGGC  
TGGGG**AGCAGGGTTTGTGCGATTAA**AGGTACACAATTTGAACAATTCAGGGAGCA**AGTC**  
ACTCTCAGAAATTCAGCTTCGGATTCCTCAAACGTCAATCACAGCCACTTCAGGACCG  
GCTGTTAGGTTTTAAATAAGGTGGCTGGGCGCGGTGGCTCACGCCTGTAATCTCAGCAC  
TTTGGGAGGCCGAGGCGGGTGGATCACGAGGTCAGGAATTCAGGACCAGCCTGGCCAAG  
ATGGTGAAATCCCCGTCCTGCTGAAAATACAAAAATTAGCCGGGCACAGTGGCAGGCG  
CCTGTAATCCCAGCTACTCGGGAGGCTGAGGCAGGAGAATCGCTGAACCCGGGGCTGG  
AGGTTGCAGTGAGCCAAGATCGCGCCACCGCACTCCAGCCTGGGCAACAGACTGAGACT  
CCGTCTCAAAAAAAAAATAAAATAAAATAAAATAAATAAGCTAACGTGTGGGAGGGTTT  
GTAAGCTCTAAACGGTCTATCTCAAAGT**GTGATCTGGGAATGCTTCCAT**ATCTCATGGG  
AACTTGTTACAAATGAGAATCTCAGACCCCATCCCAGACATACTG**AACCGGAAAC**TGTG  
GGCGGACAGCCCAACAATCGGTGTTTAAATAAGCCCCGGGTAATCTTATACACGCTAA  
AGTCTGAGAACCACTGCTCTAGAGAAATGCACAAACGTTTCCTTAGTGAG**ATTAAACAA**  
**AAGGCGAGGGG**TTGGAGGGCGCGAAACGGACCTCAGGTGCAGGGCAGACGGCATTGAG  
AGGAAACTGGGAGAGGCCGGAGTGCAGCTTGGGGAGTCTTAGCCTCCAAGGACGTTCCG  
GAACCTGCGGACGCGGGGCGCCAGCAGGTGGCGCTGGACGCGCAACGGACAAGGAGGC  
GGGGCTGCAGCTGGCTTGGAGGCTCCGCGCTCTGGAGGCTC**AGGCGCCGCTGGGGCC**  
**CGCACCTCTGGGCAGCAGCGGCAGCCGAGACTCACGGTCAAGCTAAGGCGAAGAGTGGG**  
**TGGCTGAAGCCATACTATTTTATAGAATTAATG**

**Figure S1: Sequence of STEAP1 promoter:** The promoter sequence of STEAP1 showing the sequence of the region before the transcription start site marked with black font and the sequence after TSS is marked in blue italic font with start codon highlighted as yellow. The sequences in red font are the binding sites for the primers for ChIP. The green highlight marks the reported binding sites for EWSFLI1 and the magenta highlight shows the identified probable binding sites for NKX2.2. The boxed magenta region was part of the promoter region that showed enrichment for NKX2.2 in the ChIP analysis. The underlined sequences are the putative core sequences known for NKX2.2 binding. The big black line boxed region at the top marks the region of the promoter used for creating pGL4.0-Top construct and the red line boxed region marks the region of promoter used for creating pGL4.0-Middle construct for the luciferase assay.

**Figure S2:**

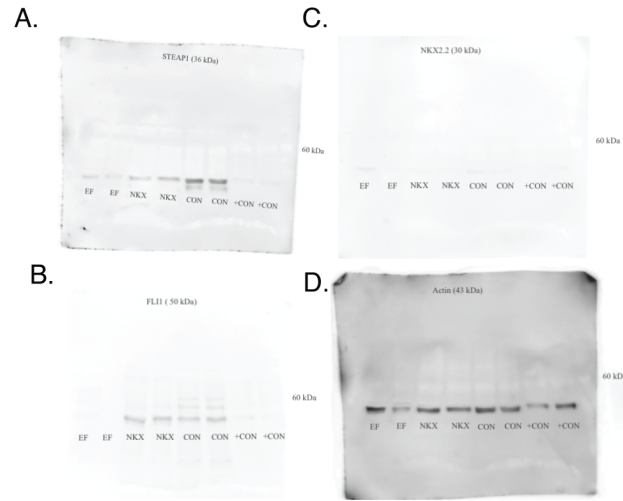

**Figure S2: Pictures of uncropped gels for western blot shown in figure 4.** The size of each protein is mentioned with its name on top of the gel. (a) The Original western blot for STEAP1 expression; lanes in duplicate = EF KD, NKX KD, knockdown control, positive control for protein, ladder. (B) Original western blot for EWS/FLI1 expression; lanes in duplicate = EF KD, NKX KD, knockdown control, positive control for protein, ladder. (C) Original western blot for NKX2.2 expression; lanes in duplicate = EF KD, NKX KD, knockdown control, positive control for protein, ladder. (D) Original western blot for Actin expression; lanes in duplicate = EF KD, NKX KD, knockdown control, positive control for protein, ladder.

**Figure S3:**

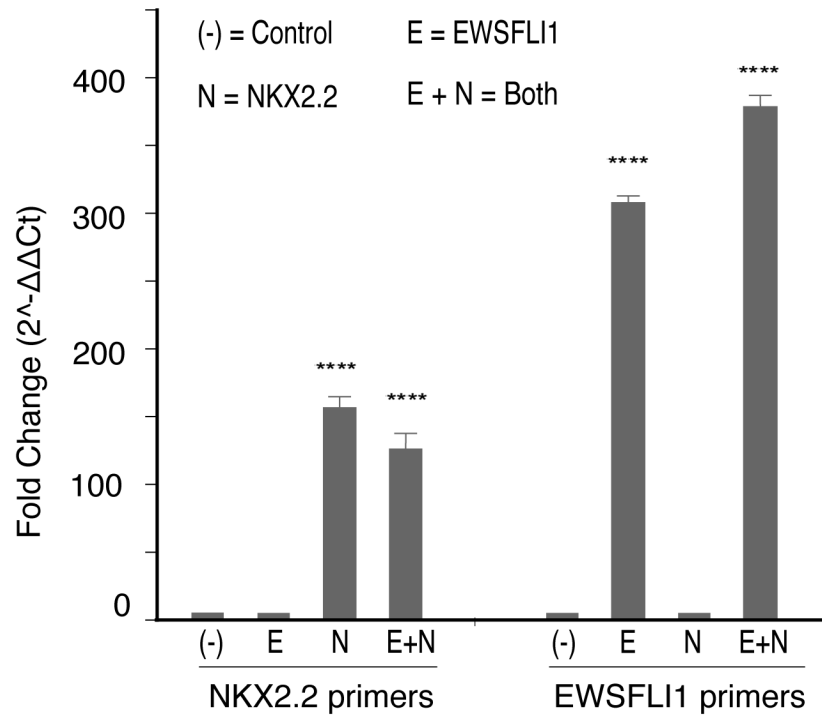

**Figure S3: Confirming transfection efficiency for luciferase assay:** The HEK293T cells were transfected with plasmids expressing either none or EWSFLI1, or NKX2.2 or both proteins. The cells were lysed 24 hours after transfection and RNA was isolated. 100 ng of RNA from each sample was used to prepare cDNA that was used as template in a qRT-PCR using NKX2.2 and EWSFLI1 and GAPDH primers. The expression was normalized using GAPDH RNA levels. The fold change from the control transfection was calculated using  $2^{-\Delta\Delta C_t}$ . A significant high expression of EWSFLI1 was found in cells transfected with plasmids expressing EWSFLI1 and both proteins and similarly high level of NKX2.2 RNA was found in cells transfected with NKX2.2 and both proteins. Error bars indicate 95% confidence interval from 3 independent experiments \*\*\*\*  $p < 0.0001$ .

**Figure S4**

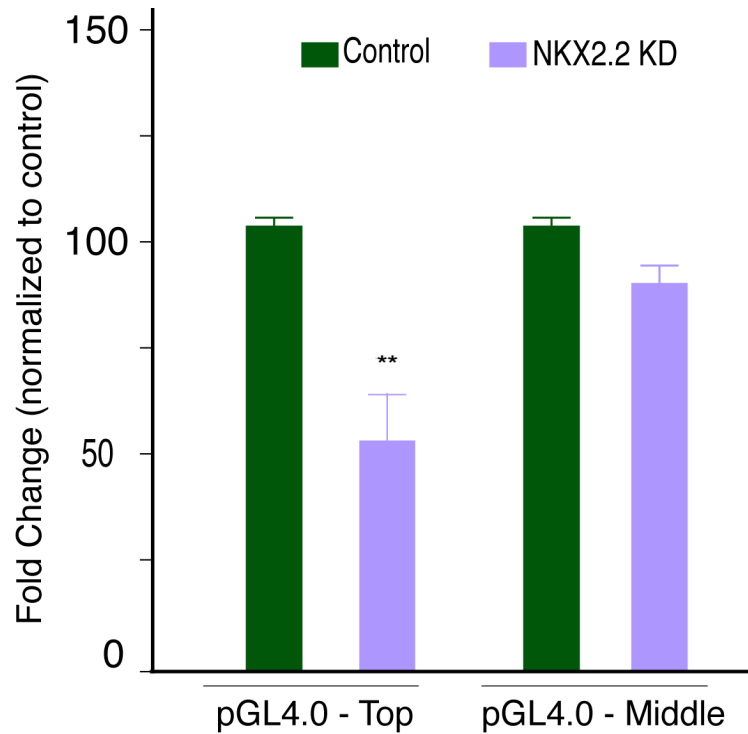

**Figure S4: Luciferase reporter assay in A673 Ewing's Sarcoma cells:** A673 control (wild type) and A673 NKX2.2 KD cells were transfected with either pGL4.0- Top plasmid (expressing the STEAP1 promoter region with binding sites for both EWSFLI1 and NKX2.2) or pGL4.0- Middle plasmid (STEAP1 promoter region devoid of any binding sites for EWSFLI1 and NKX2.2). Luciferase assay was performed 24 hours after transfection. Quantification of signal obtained when luciferase substrate was added to the supernatant of lysed cells after normalizing to transfection control. The results are depicted as percent fold change by normalizing the signal from the A673 control cells to 100%. Error bars indicate 95% confidence interval of 3 independent experiments done in triplicates. \*\*  $p < 0.01$ .

| Table S1: List of primers used in the study |                         |                         |
|---------------------------------------------|-------------------------|-------------------------|
| Target name                                 | Forward primer          | Reverse primer          |
| STEAP1 Promoter_Top                         | GGGCTTTAAACTAATCCAAG    | TCATTCTTGGGTGTTTCTCG    |
| STEAP1 Promoter_Middle                      | CTGGTTCCAACGGAGAGAAG    | TTAATCGCACAAACCCTGCT    |
| STEAP1 Promoter_Bottom                      | ACCCCATCCCAGACATACTG    | GATTACCCGGGGGCTTATTA    |
| EWS/FLI1                                    | TAGTTACCCACCCCAACTGGAT  | GGGCCGTTGCTCTGTATTCTTAC |
| NKX2.2                                      | CTCGGTCCTTATGGTGGTTATT  | AGTGTTCTCCACTTGCTTTAGA  |
| STEAP1                                      | CAATGAGGCGATCCTACAGATAC | CGTCTTCCAACCATGTCTAAT   |
| GAPDH                                       | ACAGTCAGCCGCATCTTCTT    | TTGATTTTGGAGGGATCTCG    |
| ADIPOR1                                     | GCCATGGAGAAGATGGAAGA    | GCTGTGGGGAGCAGTAGAAG    |
| DTXL3                                       | GGGCTCTGTGAGTTCTGAGG    | TCAGGCAAGTATGCAGTTTCG   |
| MMP-1                                       | GATGGGAGGCAAGTTGAAAA    | CTGGTTGAAAAGCATGAGCA    |

Table S2: List of probe sequences used for smFISH imaging

| Probe Number | EWSFLI1               | NKX2.2                | STEAP1                |
|--------------|-----------------------|-----------------------|-----------------------|
| 1            | cttcgccccgtctaggtcgac | tagtttctaactccaggagg  | ttagcttgaccgtgagtctc  |
| 2            | gtcggagagcagctccagga  | cgcggaaatggacgcaggaa  | aatagtatggcttcagccac  |
| 3            | ctcccaggtgatacagctgg  | ctctctctgtcttctttgaa  | ctgctttccattaattctat  |
| 4            | gtccgtcattttgaactccc  | aaaatgaagcccaaccagc   | ttcttggtttgtgatgtctt  |
| 5            | atggtgggcttgcttttccg  | agaaaactgggatggggagg  | taggcttcattttccaaagt  |
| 6            | ccggctcagcttgctgtaat  | attggctttaattattggga  | togtcttcttctaaatttct  |
| 7            | cactttgggtcataatgtttt | cacttgggtcaattcgtggcg | tcccgtgtccttatgcaa    |
| 8            | tgtgaagcatatcttttgccg | ttatgtcgcaaagttgtagc  | gtcttttttagcatgctggc  |
| 9            | ggcaatgccgtggaagtcaa  | tcacgcacatggttcgagac  | tgggtgcaaagcaaaagcac  |
| 10           | tcggatgtggctgcagagcc  | gaaaaccccgtctttgtgtt  | aaattcatcagcatgggctg  |
| 11           | ggacttgtagcatggacgac  | caggtctaagatgtccttga  | gctgaagttctgaagggcag  |
| 12           | acaaagttcaccttctgctg  | tcgtagaaggggttcttcag  | tgtggaaagagttcctgtgt  |
| 13           | gaggtccagttattgtgatgc | cgtgcagggagtagtgaagg  | tatttttaattggcaagtgc  |
| 14           | cctaagtggaagggcacgtg  | cttgagcttgagtcctgag   | gtcagagatgctataatagc  |
| 15           | agtaagcttctagtagtagc  | ttgtcattgtccggtgactc  | cttccctcagaagagtgtaa  |
| 16           | cttcagctagaaggccactg  | ttggagaaaagcactcgccg  | gggaagttgctaaaggggtga |
| 17           | atccagtaagtgtgcaggat  | tggaaaccagatcttgacctg | tgttgatgaccaggattgga  |
| 18           | catatgtcctgttgagtcca  | cttcactctgtagcgggtgt  | agtgatggaaaccattggca  |
| 19           | ttttgtcttcccttcaaggc  | tgagcgcgtgacatggtttg  | gcaggtaaaccaatgccaa   |
| 20           | aaaggttctatccaacaaga  | cgctgtaggcagaaaaggga  | acaattgctgctatcacacc  |
| 21           | ctggcccatggaattattca  | ttgtactgcatgtgctgcag  | acttgggtccattatgaagt  |
| 22           | actgagaattcaaactggca  | tagtggagccgagagtcac   | ccaaccaatgtggaaacttc  |
| 23           | tgcaactcacaagatgctag  | tccaaggagacgcaggcaac  | tttcttggttaacatccactt |
| 24           | tgacaagaaactgctttggt  | agagctgggtgggtggaatc  | gaaactgagaagccaaact   |
| 25           | ttctgtgtcactgaaccc    | ccaaggttcagaaggagagg  | attgcatgcagtacagcaaa  |
| 26           | gaacatgacgggttaagtcc  | ctgtaaacacggcgtagagt  | cattgggtaagacagactat  |
| 27           | actggccttacaatcaatgt  | agaagcgaagctgcgcaaac  | acttgtatctgtaggatcgc  |
| 28           | attccagttgggtgaaaact  | gacgacattaacgctgggac  | tgttgatatgccagtttag   |
| 29           | ttggcgtcttaaacacacaa  | ggtctttttctcgttttcaa  | ggcatcttctttattttgtt  |
| 30           | tgcatactgtccactgagag  | aatgcacgaaagcaggggtg  | tctccaaacatcatgctcaa  |
| 31           | tctagagagagtggctcagc  | tcgctactcacacaaacata  | ccagagacacataaatctcc  |
| 32           | cccgtctttcaggaatgtat  | ctttagaagacggctgacaa  | agtattgccaatcccacaat  |
| 33           | gagtttagaaatccctacaa  | tttttaaagtgttctccact  | agatgtcacagccaacagag  |
| 34           | cacagcacttgcaatctgc   | cagaacgtttacatggccat  | aagagtcactcacagatgga  |
| 35           | tggctctgatggtctgacaag | aaagcgaaatctgccaccag  | tagtgaaattctctccatgt  |
| 36           | ttgccttctgattggttggc  | tcaccaccgatattttacaac | aattcctagcttgctctgaa  |
| 37           | ttgtgaccgaggtcaactcg  | cctgaaggtcatttttgcaa  | ttgtgccagtagaagggaa   |
| 38           | tgattcgatagtaaaactgc  | agaaaggagttggaccaga   | ccaggcaaaaatcaatgcgt  |
| 39           | catcacagacagccaaatgt  | cagggttttcttttccatat  | tgttttatatctatccaactt |
| 40           | gtcagtgacttaaacagccc  | aatagctgagctccaagttc  | ggtggaggtgtataccatac  |
| 41           | gcctgttaaataactgtacc  |                       | catggcaggaatagtagct   |
| 42           | tatcttttccctgcttgtgt  |                       | atcttcagtagcttcttcc   |
| 43           | tgtttttccagagctgtga   |                       | taattttgggtgacgtctcc  |
| 44           | tctccacaagggaaagtctc  |                       | actgggaacatatctcagtt  |
| 45           | tatagagcagggaaatccct  |                       |                       |
| 46           | agttgtcagcttaaacactta |                       |                       |
| 47           | ttacaacatggtcttctttg  |                       |                       |
| 48           | aggaaccattttatttagtca |                       |                       |
